# Supplementary material for: Molecular Capture of Mycobacterium tuberculosis Genomes Directly from Clinical Samples: A Potential Backup Approach for Epidemiological and Drug Susceptibility Inferences
Source: Int J Mol Sci. 2023 Feb 2;24(3):2912. doi: 10.3390/ijms24032912 (PMC9918089; doi:10.3390/ijms24032912)
Supplement: Supplementary file 1 [file ijms-24-02912-s001.zip › Table_S1.xlsx]

## Sheet: Folha1
Table S1. Characterization of the 100 M. tuberculosis-positive samples subjected to SureSelect XT HS target enrichment protocol.
Sample	Microscopy (AFB score)	DNA input (ng)	No. Copies KatG/ul	No. Copies β-actin/ul	final library molarity (nM)	No. raw reads	No. Trimmed reads	% trimmed reads on-target	No. trimmed reads on-target	%genome covered ≥10-fold	%Mycobacteriacea reads	% TB-profiler positions analysed with ≥10-fold depth of coverage (total=9233)	Resistance-associated mutations identified by TB-profiler (frequency in population)	pDST	ENA accession number
Mtb_Sample_001	3	11.9	560	6700	0.5236	1191982	960274	0.8839	848786	0.759827	0.9033	0.83494	none	STR	ERR10796548
Mtb_Sample_002	3	12.7	2175	1330	0.4273	1567076	1208416	0.7793	941719	0.788604	0.7971	0.857901	pncA_p.Pro69Leu (1.00)	Fully susceptible	ERR10796549
Mtb_Sample_003	3	11.4	391	1620	0.7387	841398	737830	0.8421	621327	0.658945	0.8598	0.768006	pncA_p.His82Tyr (0.11)	STR	ERR10796550
Mtb_Sample_004	3	41.7	1535	83	2.4278	1963632	1100428	0.9574	1.05355e+06	0.813801	0.9655	0.845446	none	Fully susceptible	ERR10796551
Mtb_Sample_005	3	15.84	NA	NA	0.3939	4255362	4146686	0.9497	3.93811e+06	0.984264	0.956	1	none	Fully susceptible	ERR10796552
Mtb_Sample_006	3	18	NA	NA	2.0828	2371008	2244466	0.3301	740898	0.000817641	0.3309	0.590382	none	Fully susceptible	ERR10796553
Mtb_Sample_007	3	26.56	NA	NA	0	4158962	4039094	0.9185	3.70991e+06	0.990587	0.9281	1	none	Fully susceptible	ERR10796554
Mtb_Sample_008	3	328.8	NA	NA	0.0045	4834224	4667684	0.6726	3.13948e+06	0.967856	0.6799	1	embC_p.Gly308Asp (0.13)	Fully susceptible	ERR10796555
Mtb_Sample_009	3	15.76	NA	NA	0.0716	14812932	14448900	0.9587	1.38522e+07	0.977979	0.9635	1	none	Fully susceptible	ERR10796556
Mtb_Sample_010	3	21.12	NA	NA	0.0038	1384164	1289374	0.4353	561265	0.000573761	0.4469	0.481425	none	Fully susceptible	ERR10796557
Mtb_Sample_011	3	12.08	NA	NA	0.0058	916758	891440	0.8617	768154	0.0140697	0.8614	0.821618	none	Fully susceptible	ERR10796558
Mtb_Sample_012	2	10	NA	NA	1.2171	2508682	2431738	0.1687	410234	0.000714289	0.1173	0.152605	none	Fully susceptible	ERR10796559
Mtb_Sample_013	1	11.48	NA	NA	0.0363	1924096	1857100	0.2918	541902	0.00126649	0.2264	0.40886	none	Fully susceptible	ERR10796560
Mtb_Sample_014	3	54.4	NA	NA	0.9145	9067708	8648600	0.6033	5.2177e+06	0.665751	0.6149	0.998592	pncA_c.361_362delCG (0.12)	Fully susceptible	ERR10796561
Mtb_Sample_015	2	8.8	NA	NA	0.3651	6830330	6645248	0.7081	4.7055e+06	0.419354	0.7499	0.993826	embB_p.Met306Ile (0.11)	Fully susceptible	ERR10796562
Mtb_Sample_016	1	35.8	NA	NA	0.5417	3124696	3036168	0.8373	2.54218e+06	0.97464	0.8458	1	none	Fully susceptible	ERR10796563
Mtb_Sample_017	2	14.56	NA	NA	3.9133	9312006	8949754	0.6747	6.0384e+06	0.471392	0.6701	0.98083	pncA_p.Thr47Ala (0.20)	Fully susceptible	ERR10796564
Mtb_Sample_018	1	13.52	NA	NA	2.1959	2591236	2509562	0.1558	390990	0.00198573	0.01363	0.0183039	none	Fully susceptible	ERR10796565
Mtb_Sample_019	3	10.16	NA	NA	1.6093	1688302	1642420	0.8773	1.4409e+06	0.00181001	0.8862	0.663923	none	Fully susceptible	ERR10796566
Mtb_Sample_020	3	15.36	NA	NA	0.4348	11259850	10908068	0.5764	6.28741e+06	0.674422	0.5675	1	rrs_n.1402C>A (0.20)	Fully susceptible	ERR10796567
Mtb_Sample_021	1	154	422	1600000	0.0452	3033712	151420	0.4109	62218.5	0.000537576	0.4318	0.098018	none	Fully susceptible	ERR10796568
Mtb_Sample_022	2	24.8	94	94000	0.0238	2267394	341704	0.0123	4202.96	0.000391595	0.06195	0.00617351	none	Fully susceptible	ERR10796569
Mtb_Sample_023	2	242.2	2976	748000	0.0935	16932706	12441442	0.9308	1.15805e+07	0.93811	0.9373	0.990686	none	Fully susceptible	ERR10796570
Mtb_Sample_024	1	49	3312	51600	0.0793	5348942	1047902	0.2898	303682	0.00125187	0.00234	0.000974764	none	Fully susceptible	ERR10796571
Mtb_Sample_025	1	268.8	2676	191600	0.1777	13876746	11023400	0.1139	1.25557e+06	0.101552	0.09464	0.562656	none	Fully susceptible	ERR10796572
Mtb_Sample_026	3	27.7	21040	12520	9.4853	4268796	3522444	0.964	3.39564e+06	0.981142	0.9712	1	none	Fully susceptible	ERR10796573
Mtb_Sample_027	3	11.6	804	5520	0.3924	191556	108212	0.7109	76927.9	0.000482059	0.7091	0.0421315	none	Fully susceptible	ERR10796574
Mtb_Sample_028	3	20.3	328.4	8960	1.6021	418878	329408	0.683	224986	0.00192328	0.6931	0.199935	none	STR + INH	ERR10796575
Mtb_Sample_029	1	14.1	172.8	4640	0.4991	152968	62002	0.5593	34677.7	0.000914548	0.5125	0.00216614	none	Fully susceptible	ERR10796576
Mtb_Sample_030	1	41	312.4	62000	0.1257	9382056	754956	0.1868	141026	0.00148063	0.0324	0.0290263	none	Fully susceptible	ERR10796577
Mtb_Sample_031	3	25.9	2564	6880	0.446	8294746	6712732	0.8873	5.95621e+06	0.946511	0.9045	0.997076	none	Fully susceptible	ERR10796578
Mtb_Sample_032	3	243.6	50400	944000	0.2381	27032918	21641946	0.9902	2.14299e+07	0.98653	0.9931	1	none	Fully susceptible	ERR10796579
Mtb_Sample_033	2	10.2	274	11120	0.028	3819596	2704504	0.9454	2.55684e+06	0.0327929	0.9544	0.837648	none	Fully susceptible	ERR10796580
Mtb_Sample_034	3	9.5	1328	4880	0.9733	1759004	1397576	0.9473	1.32392e+06	0.438767	0.9565	0.870681	fabG1_c.-15C>T (0.12)	Fully susceptible	ERR10796581
Mtb_Sample_035	1	11.6	476	8320	0.2535	1490992	984134	0.9296	914851	0.0428323	0.9383	0.739955	none	Fully susceptible	ERR10796582
Mtb_Sample_036	2	9.8	NA	NA	1.8072	4664052	3761252	0.9827	3.69618e+06	0.957701	0.988	0.978014	none	Fully susceptible	ERR10796583
Mtb_Sample_037	2	130.9	382	1530000	0.646	24622	12792	0.7662	9801.23	9.93858e-05	0.7833	0	none	Fully susceptible	ERR10796584
Mtb_Sample_038	1	32.3	44.6	458000	0.3978	31172	1512	0.1144	172.973	0	0.1254	0	none	Not done - negative culture	ERR10796585
Mtb_Sample_039	1	100.2	NA	NA	0.4039	55024	21574	0.2239	4830.42	0.000423319	0.02042	0	none	Fully susceptible	ERR10796586
Mtb_Sample_040	1	136.4	NA	NA	0.2291	1094	52	0.0385	2.002	0	NA	0	none	Not done - negative culture	ERR10796587
Mtb_Sample_041	2	43.3	15200	514000	0.444	418816	319650	0.9804	313385	0.114673	0.9852	0.29687	none	Fully susceptible	ERR10796588
Mtb_Sample_042	2	245	194.6	1190000	0.0512	2750458	2137706	0.3085	659482	0.00136687	0.0008341	0.000866457	none	Fully susceptible	ERR10796589
Mtb_Sample_043	3	163	876	1244000	0.0234	353422	244814	0.7648	187234	0.000431746	0.777	0.126178	none	Not done - negative culture	ERR10796590
Mtb_Sample_044	1	30.5	272	8840	0.1126	2720204	1561224	0.3781	590299	0.00148509	0.2632	0.298928	none	Not done - negative culture	ERR10796591
Mtb_Sample_045	2	25.9	528	19720	0.0676	2346932	619322	0.6439	398781	0.00220979	0.6519	0.386548	none	Not done - negative culture	ERR10796592
Mtb_Sample_046	1	14.1	284.4	5640	0.1169	4115540	2345978	0.8011	1.87936e+06	0.0226045	0.8085	0.789776	none	Not done - negative culture	ERR10796593
Mtb_Sample_047	1	9.1	98	3120	0.0353	1158396	795894	0.2658	211549	0.000691983	0.07931	0.0707246	none	Fully susceptible	ERR10796594
Mtb_Sample_048	1	8.1	88.8	2096	0.0419	1724480	762808	0.3108	237081	0.000577479	0.1609	0.140691	none	Not done - negative culture	ERR10796595
Mtb_Sample_049	1	31.2	448	23240	0.5584	442126	284754	0.3167	90181.6	0.000711563	0.2207	0.0783061	none	Not done - negative culture	ERR10796596
Mtb_Sample_050	2	26.6	556	11840	0.0916	17370066	8135120	0.4023	3.27276e+06	0.0625137	0.3346	0.781003	none	STR	ERR10796597
Mtb_Sample_051	1	109.1	216	790000	0.1215	23706066	10011138	0.2402	2.40468e+06	0.00320711	0.0725	0.494747	none	Fully susceptible	ERR10796598
Mtb_Sample_052	2	83.2	3200	792000	0.62	1858540	1076168	0.9084	977591	0.60375	0.9063	0.796383	pncA_c.-12T>C (0.11), pncA_p.Leu35Pro (0.12), ethA_p.Trp455* (0.11)	Not done - negative culture	ERR10796599
Mtb_Sample_053	3	59.64	36800	56900	3.4552	5687372	5508656	0.9843	5.42217e+06	0.970566	0.9918	1	none	Fully susceptible	ERR10796600
Mtb_Sample_054	3	39.13	24900	59100	2.5325	6519298	6337634	0.7943	5.03398e+06	0.973134	0.8088	0.978014	none	Fully susceptible	ERR10796601
Mtb_Sample_055	3	2.576	7400	2270	3.6448	5240052	5076918	0.9824	4.98756e+06	0.970928	0.9903	0.993718	none	Fully susceptible	ERR10796602
Mtb_Sample_056	3	3.99	6010	3030	8.0584	6529374	6333544	0.9882	6.25881e+06	0.980484	0.9954	1	none	Fully susceptible	ERR10796603
Mtb_Sample_057	3	17.01	5750	11600	0.4432	2481604	2401254	0.951	2.28359e+06	0.927426	0.9733	0.973356	none	Fully susceptible	ERR10796604
Mtb_Sample_058	3	6.16	3970	11600	0.7991	3462252	3373822	0.9822	3.31377e+06	0.947406	0.9899	0.989711	none	Not done - negative culture	ERR10796605
Mtb_Sample_059	3	11.62	3910	17400	1.2064	6365592	6184208	0.9815	6.0698e+06	0.972304	0.9885	0.999025	none	Fully susceptible	ERR10796606
Mtb_Sample_060	3	7.91	3610	4280	0.1012	678436	656980	0.9806	644235	0.649402	0.9892	0.793567	none	Not done - negative culture	ERR10796607
Mtb_Sample_061	3	29.75	2130	28900	0.4445	2258698	2192022	0.843	1.84787e+06	0.868584	0.8834	0.877288	none	Not done - negative culture	ERR10796608
Mtb_Sample_062	2	3.157	1940	3810	0.3015	1490618	1456336	0.9638	1.40362e+06	0.657938	0.9734	0.785335	none	Not done - negative culture	ERR10796609
Mtb_Sample_063	3	9.17	1390	10000	0.0059	306	300	0.04	12	0	1	0	none	Fully susceptible	ERR10796610
Mtb_Sample_064	3	12.6	1380	2130	0.0107	62846	25604	0.6043	15472.5	0.000281552	0.613	0.000108307	none	Fully susceptible	ERR10796611
Mtb_Sample_065	2	8.54	1030	7910	0.2002	867524	833758	0.9333	778146	0.689849	0.9421	0.855843	katG_p.Trp689* (0.13)	Fully susceptible	ERR10796612
Mtb_Sample_066	2	6.496	817	2230	0.1138	714398	691068	0.9662	667710	0.561007	0.9747	0.802773	none	Not done - negative culture	ERR10796613
Mtb_Sample_067	2	4.76	769	2990	0.065	600850	583720	0.9602	560488	0.596758	0.9662	0.731507	none	Not done - negative culture	ERR10796614
Mtb_Sample_068	1	20.79	716	18500	0.0324	194936	178442	0.8555	152657	0.0504622	0.8787	0.0386657	none	INH	ERR10796615
Mtb_Sample_069	2	9.87	690	3950	1.1284	9603996	8376910	0.9518	7.97314e+06	0.984462	0.9565	1	none	Fully susceptible	ERR10796616
Mtb_Sample_070	3	6.965	690	10300	0.5486	9338602	8109032	0.9826	7.96793e+06	0.98449	0.9874	1	none	Fully susceptible	ERR10796617
Mtb_Sample_071	2	15.75	636	4600	0.3808	6605362	5732418	0.8052	4.61574e+06	0.970843	0.8274	0.999783	none	Fully susceptible	ERR10796618
Mtb_Sample_072	2	7.91	595	7380	0.045	794580	709372	0.9778	693624	0.563466	0.9853	0.740279	ethA_c.47delG (0.12)	Fully susceptible	ERR10796619
Mtb_Sample_073	3	6.454	541	11600	0.1057	2946578	2578662	0.8862	2.28521e+06	0.901961	0.8913	0.929817	none	STR	ERR10796620
Mtb_Sample_074	2	4.662	350	2510	0.4411	6690898	5781234	0.9705	5.61069e+06	0.969486	0.9751	0.999783	none	Not done - negative culture	ERR10796621
Mtb_Sample_075	2	7.49	347	3870	0.4999	7384646	6387968	0.9763	6.23657e+06	0.975138	0.9825	1	none	Fully susceptible	ERR10796622
Mtb_Sample_076	2	2.912	318	928	0.7561	12082528	10337272	0.9773	1.01026e+07	0.988103	0.9827	0.9987	none	Fully susceptible	ERR10796623
Mtb_Sample_077	2	8.47	289	4290	0.7247	10157030	8778644	0.9571	8.40204e+06	0.980192	0.9637	1	none	Fully susceptible	ERR10796624
Mtb_Sample_078	3	3.22	273	4450	0.322	4892322	4178448	0.9384	3.92106e+06	0.93581	0.9505	0.990577	tlyA_c.592delG (0.18)	Fully susceptible	ERR10796625
Mtb_Sample_079	2	10.29	246	22600	0.0216	437936	382454	0.8061	308296	0.0542949	0.8205	0.295245	none	Not done - negative culture	ERR10796626
Mtb_Sample_080	2	12.53	237	330	0.0354	477396	419260	0.5204	218183	0.0396621	0.5412	0.250839	none	Fully susceptible	ERR10796627
Mtb_Sample_081	2	6.363	213	5980	0.3937	7341008	6435360	0.9518	6.12518e+06	0.977842	0.9581	1	none	Fully susceptible	ERR10796628
Mtb_Sample_082	2	14.91	203	18300	0.0076	321246	282342	0.5981	168869	0.0194467	0.5902	0.0958518	none	Fully susceptible	ERR10796629
Mtb_Sample_083	2	9.38	202	10100	0.1224	1344160	1179714	0.5481	646601	0.12888	0.5505	0.576844	none	Not done - negative culture	ERR10796630
Mtb_Sample_084	3	16.562	189	32200	0.024	404516	340208	0.6522	221884	0.00424484	0.704	0.160728	none	Fully susceptible	ERR10796631
Mtb_Sample_085	2	3.997	165	4250	0.1294	2274550	1987600	0.96	1908096	0.772583	0.9655	0.951045	none	Fully susceptible	ERR10796632
Mtb_Sample_086	2	3.213	133	2130	0.0832	1524128	1356408	0.6836	927241	0.313971	0.6987	0.772663	none	Not done - negative culture	ERR10796633
Mtb_Sample_087	2	2.415	96.6	3660	0.1194	945532	852796	0.7011	597895	0.117353	0.7036	0.5528	none	Fully susceptible	ERR10796634
Mtb_Sample_088	2	2.359	59.9	1100	0.439	1285748	1138972	0.7697	876667	0.227875	0.7895	0.765515	rrs_n.462C>T (0.25)	Fully susceptible	ERR10796635
Mtb_Sample_089	3	9.52	10.9	37000	0.2978	4309478	3768372	0.9262	3.49027e+06	0.94793	0.9443	0.998159	none	Fully susceptible	ERR10796636
Mtb_Sample_090	3	16.38	7360	46900	3.0645	22311994	19818118	0.9908	1.96358e+07	0.993933	0.9944	1	none	Fully susceptible	ERR10796637
Mtb_Sample_091	3	21.56	8720	55500	6.3923	29294314	26225228	0.9705	2.54516e+07	0.991566	0.9742	1	ethA_c.-339_*1091del (1.00)	Fully susceptible	ERR10796638
Mtb_Sample_092	3	32.62	22700	121000	12.0104	28269736	24605580	0.9947	2.44752e+07	0.991024	0.9976	1	ethA_c.-339_*1091del (1.00)	Fully susceptible	ERR10796639
Mtb_Sample_093	3	65.38	2600	156000	3.7892	27113326	23997616	0.9097	2.18306e+07	0.992306	0.9153	1	none	Fully susceptible	ERR10796640
Mtb_Sample_094	3	38.36	1680	147000	1.0069	13908954	12522758	0.9492	1.18866e+07	0.988963	0.9594	1	rpoB_p.Ser450Leu (1.00), katG_p.Ser315Thr (0.99), pncA_p.Asp63Ala (1.00), embA_c.-16C>G (1.00), embB_p.Met306Val (1.00), rpsL_p.Lys43Arg (1.00), ethA_c.180delC (1.00), thyX_c.-16C>T (1.00)	STR + INH + RIF + EMB + PZA + ETH	ERR10796641
Mtb_Sample_095	3	13.86	8990	32200	8.9796	26874734	24035488	0.9939	2.38889e+07	0.991657	0.9965	1	ethA_c.-339_*1091del (1.00)	Fully susceptible	ERR10796642
Mtb_Sample_096	3	47.39	16900	158000	4.1913	29266300	26121556	0.9464	2.47214e+07	0.991268	0.9501	1	ethA_c.-339_*1091del (1.00)	Fully susceptible	ERR10796643
Mtb_Sample_097	3	19.25	128	74300	0.1427	1456078	1293120	0.7237	935831	0.472798	0.7339	0.821077	none	Fully susceptible	ERR10796644
Mtb_Sample_098	3	20.23	19	39100	0.0726	734668	647380	0.2565	166053	0.00140652	0.1292	0.0346583	none	Fully susceptible	ERR10796645
Mtb_Sample_099	3	39.48	8280	176000	3.6665	24283240	21747922	0.9332	2.02952e+07	0.993875	0.9389	1	none	Fully susceptible	ERR10796646
Mtb_Sample_100	3	44.17	8930	80300	4.8989	30635472	27372544	0.9935	2.71946e+07	0.992877	0.996	1	none	INH	ERR10796647
EMB - ethambutol, ETH - ethionamide, INH - isoniazid, PZA - pyrazinamide, RIF - rifampicin, STR - streptomycin, pDST - phenotypic drug susceptibility testing, ENA - European Nucleotide Archive, AFB - Acid-Fast Bacilli
